# Supplementary material for: Structural basis for the nuclear import and export functions of the biportin Pdr6/Kap122
Source: PubMed Central journal article supplement (PMC6548137; doi:10.1083/jcb.201812093), 2019-04-25
Supplement: JCB_201812093_sm.pdf [file JCB_201812093_sm.pdf]

Supplemental material

Aksu et al., <https://doi.org/10.1083/jcb.201812093>

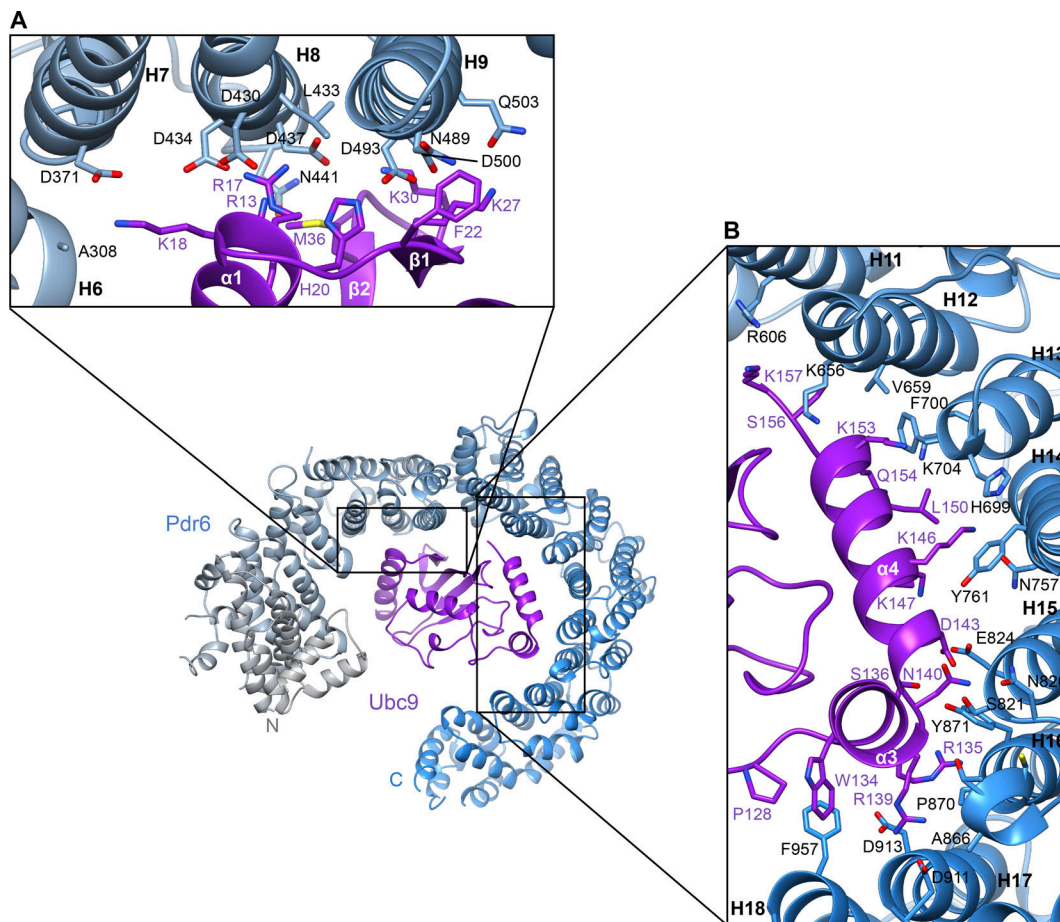

Figure S1. **Ubc9 recognition by Pdr6.** In the middle, the import complex is shown as in Fig. 2 D. Magnified views illustrate interaction interface 1 (A) and 2 (B).

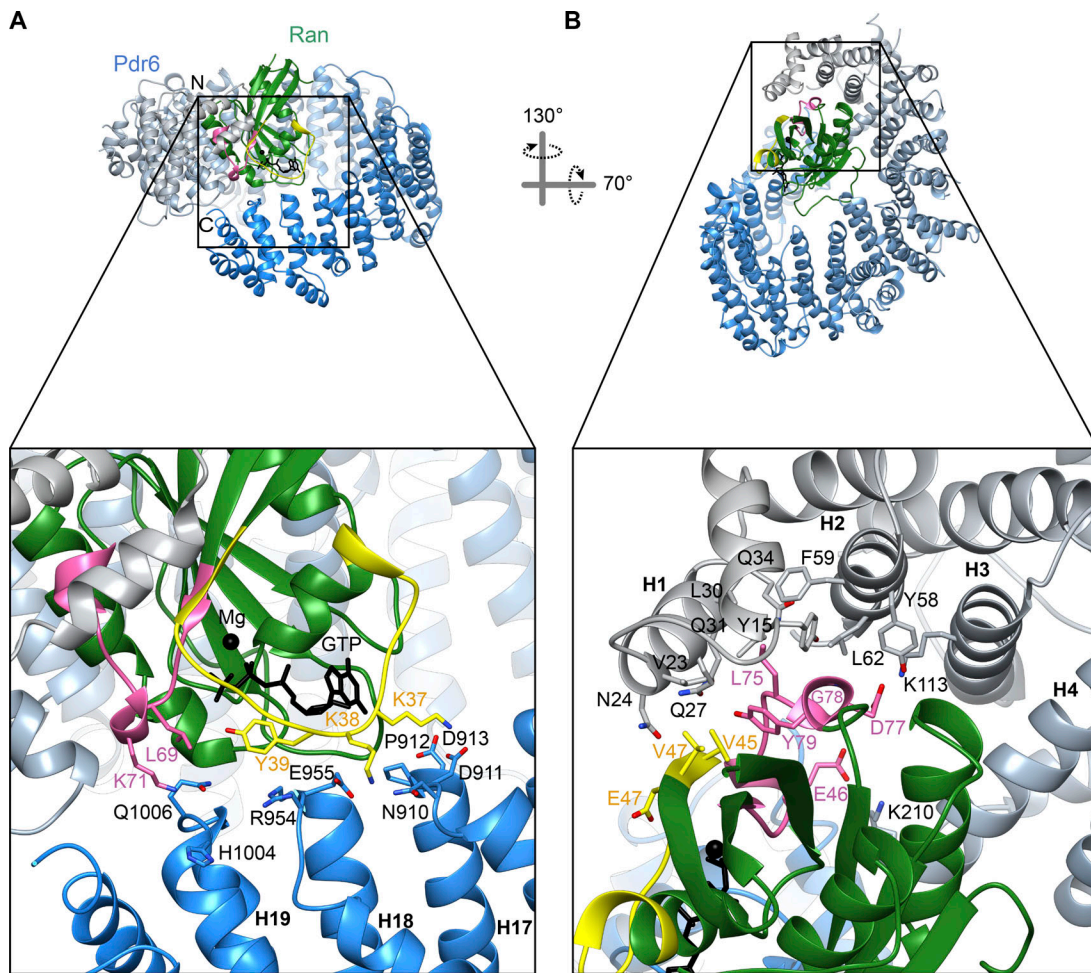

Figure S2. **Recognition of Ran's Switch I and II regions by Pdr6.** Recognition of Switch regions by C-terminal (A) and N-terminal (B) repeats of Pdr6. The color-coding of the complex is the same as in Fig. 4 B. The magnified views (bottom) show the interacting residues.

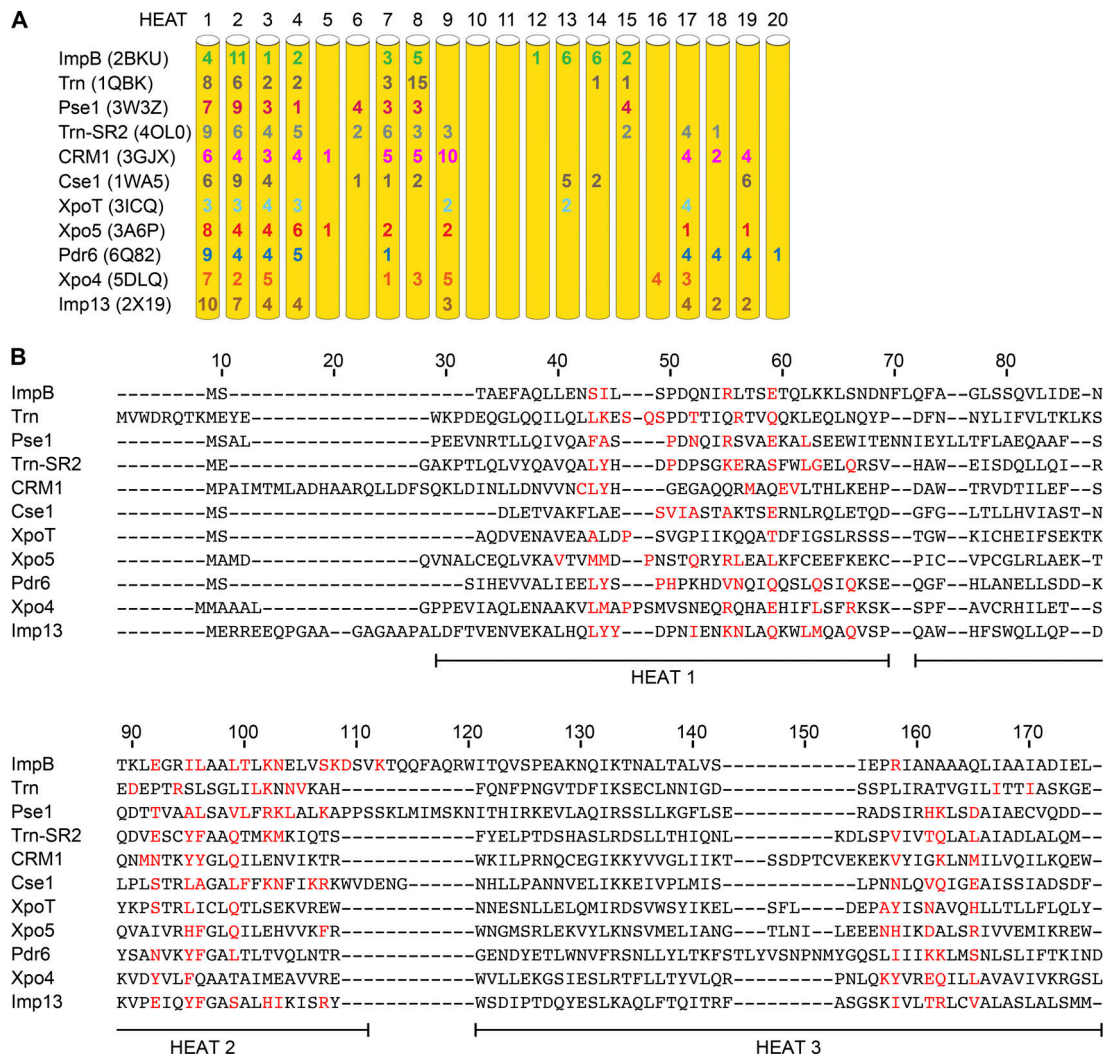

Figure S3. **NTR-RanGTP interactions.** **(A)** Schematic representation of RanGTP interaction interfaces of NTRs. Indicated RanGTP/Gsp1GTP•NTR structures were analyzed for NTR-RanGTP contacts, and the number of RanGTP-interacting residues in each HEAT repeat is indicated on the corresponding repeat. Note that ImpB actually lacks HEAT 20 and that Pse1 has 24 HEAT repeats, with the last four being omitted in the illustration. **(B)** Sequence alignment of the first three HEAT repeats of NTRs depicted in A. RanGTP-interacting residues are shown in red. Although the sequence conservation between these NTRs is rather low, the positional conservation of RanGTP-interacting residues is high.

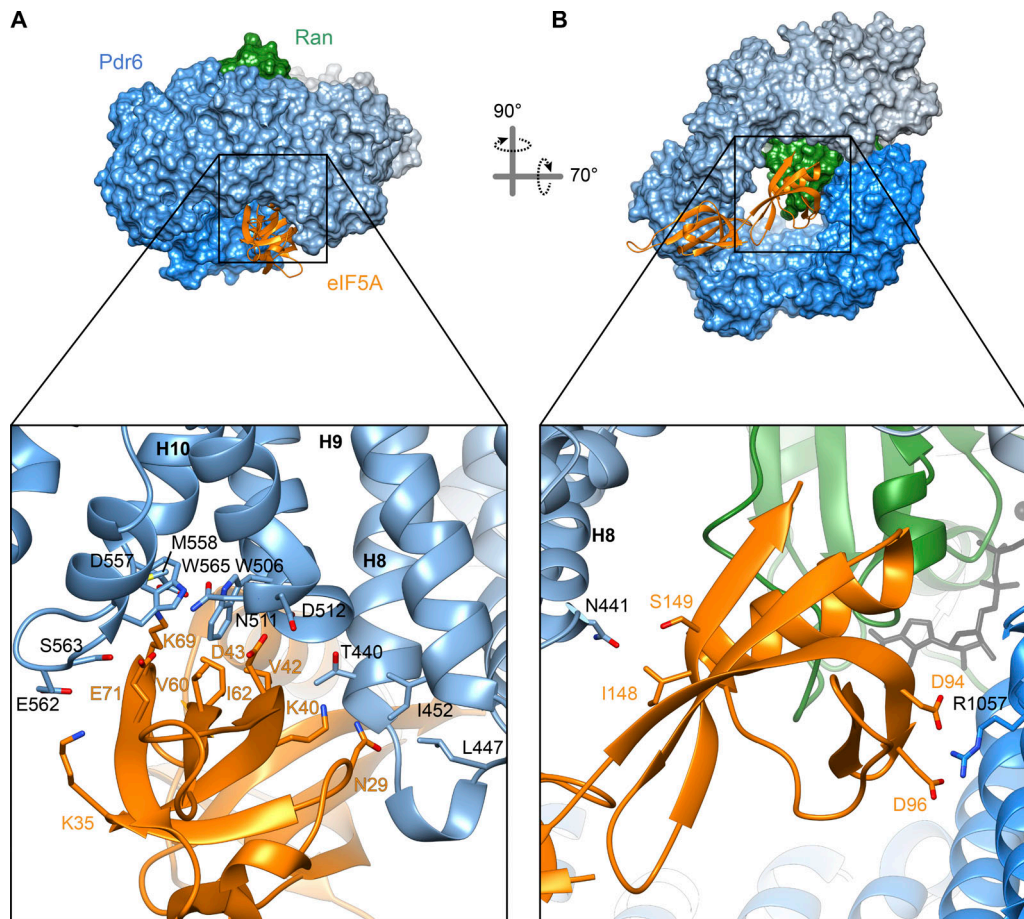

Figure S4. **Interactions of eIF5A with Pdr6.** Docking of the N-terminal (A) and C-terminal (B) domains of eIF5A on the Pdr6•RanGTP heterodimer. Pdr6 and Ran are depicted as the surface whereas eIF5A is shown as the ribbon (top). The magnified views (bottom) show the interacting residues.

Table S1. **List of plasmids used in this study**

| Identifier | Construct                      |
|------------|--------------------------------|
| pMA238     | H14-ZZ-bdSUMO-scPdr6           |
| pAV366     | H14-bdNEDD8-scUbc9             |
| l-19       | H10-ZZ-TEV-hsUbc9              |
| pKG031     | H14-ZZ-bdSUMO-hsRan5-180(Q69L) |
| pMA335     | H14-ZZ-brNEDD8-sceIF5A(16-157) |
| pMA061     | H14-ZZ-bdSUMO-hseIF5A          |
| pMA166     | H14-ZZ-bdSUMO-hseIF5A_E42R     |
| pMA188     | H14-ZZ-bdSUMO-hseIF5A_R26E     |
| pMA189     | H14-ZZ-bdSUMO-hseIF5A_K50A     |
| pMA190     | H14-ZZ-bdSUMO-hseIF5A_K50R     |
| pMA191     | H14-ZZ-bdSUMO-hseIF5A_H51A     |
| pMA192     | H14-ZZ-bdSUMO-hseIF5A_K50H51AA |
| pMA193     | H14-ZZ-bdSUMO-hseIF5A_S75R     |
| pMATxn013  | H14-ZZ-bdSUMO-hsImp13          |
| pMA083     | H14-bdSUMO-mmXpo4              |
